# Supplementary material
Source: PubMed Central journal article supplement (PMC4049468)
Supplement: NIHMS349860-supplement-Appendixes_I___II.pdf [file NIHMS349860-supplement-Appendixes_I___II.pdf]

## Appendix I: Calculating and Displaying Confidence Intervals and Bands Using Meta-Regression in Stata

- 1) First make sure that Stata has installed the most recent version of the `metareg` command by using the “lookup” command:

```
. lookup metareg

Keyword search

Keywords:  metareg
Search:    (1) Official help files, FAQs, Examples, SJs, and STBs

Search of official help files, FAQs, Examples, SJs, and STBs

SJ-8-4    sbe23_1 . . . . . Meta-regression in Stata
          (help metareg if installed) . . . . R. M. Harbord and J. P. T. Higgins
          Q4/08    SJ 8(4):493--519
          presents a revised version of the metareg command, which
          performs meta-analysis regression on study-level summary
          data
```

Selecting the `sbe23_1` entry (above) lets a user install or update to incorporate Harbord’s `metareg` command, which was first published in 2008 (Harbord and Higgins, 2008), updated from an earlier version that Stata published in 1998. If the Lipsey and Wilson (2001) `metareg` macro is also installed, it will need to be renamed in order for the alternative to operate. For the graphs we produced for this paper, we used Stata version 11.2.

- 2) After installing or updating the command, it can be used to estimate meta-analysis regression (viz. meta-regression) models. The basic form of the command follows this format:

```
. metareg T moderator1 moderator2, wsse(se_T)
```

where  $T$  is the effect size, *moderator1* and *moderator2* are moderator dimensions, and  $se_T$  is the standard error for each  $T$ . By default, this command will invoke a random-effects constant (see discussion in the text about “mixed-” vs. “random-effects” assumptions). If inverse-variance weights,  $TW$ , have been calculated for each  $T$  (see, e.g., Lipsey & Wilson, 2001, Table 3.2), but not  $se_T$  then to use the command, it is necessary to calculate  $se_T$ :

```
. gen se_T=1/sqrt(TW)
```

For example, in the antidepressants data described in the main text, the command

```
. metareg diffimp meanbase, wsse(se_diffimp) graph
```

where `diffimp` is the  $T$  (difference in improvement in depression between drug and placebo groups), `meanbase` is the mean severity of depression at baseline, and  $se_{diffimp}$  is the standard error for each  $T$ , produces statistical output for the meta-regression model and a so-called bubble graph, where the bubbles are individual  $T$ s sized according to their weight in the analysis, and inserts a line indicating the meta-regression line. The command can be used to generate confidence intervals at certain values of the moderator variable, such as the lowest and highest observed values. For example,

```
. gen tempvar=meanbase-17.0631
```

where 17.0631 was the lowest observed mean severity of depression at baseline, and *tempvar* is intended to replace *meanbase* in the re-instantiated command:

```
. metareg diffimp tempvar, wsse(se_diffimp) graph
```

which moves the constant or intercept to the value of 17 (the graph now literally shows the intercept at the zero point of the newly calculated variable, *tempvar*, on the left side of the graph). To obtain an estimate at the highest observed mean value, 29.444:

```
. replace tempvar=meanbase-29.444
```

and we re-use the *tempvar* variable and re-instantiate the *metareg* command:

```
. metareg diffimp tempvar, wsse(se_diffimp) graph
```

and the zero point now appears on the right side of the graph. (Note that the *graph* command will not work with more than one covariate or moderator.) These models provide confidence intervals for these point estimates but not confidence bands and other additions; for these, see the next steps.

- 3) Because the *metareg* command can be used with post-estimation commands, a number of other possibilities for graphing become possible. Specifically, after running the *metareg* command, run these commands:

| Command                                             | Explanation                                                                                                                          |
|-----------------------------------------------------|--------------------------------------------------------------------------------------------------------------------------------------|
| <code>. predict fit</code>                          | Saves predicted values from the model for each <i>T</i> in a variable called <i>fit</i>                                              |
| <code>. predict stdp, stdp</code>                   | Saves the standard error of the prediction in a variable called <i>stdp</i>                                                          |
| <code>. predict stdf, stdf</code>                   | Saves the standard error of the forecast in a variable called <i>stdf</i>                                                            |
| <code>. predict xbu, xbu</code>                     | Saves empirical Bayes estimates (predictions including random effects) in a variable called <i>xbu</i>                               |
| <code>. local t = invttail(e(df_r)-1, 0.025)</code> | <i>t</i> is used in calculating 95% confidence and prediction bands; for 90%, replace 0.025 with 0.05; for 99% replace it with 0.005 |
| <code>. gen confl = fit - `t'*stdp</code>           | Calculate lower confidence band (using standard error of the prediction), <i>confl</i>                                               |
| <code>. gen confu = fit + `t'*stdp</code>           | Calculate upper confidence band (using standard error of the prediction), <i>confu</i>                                               |
| <code>. gen predl = fit - `t'*stdf</code>           | Calculate lower prediction band (using standard error of the forecast), <i>predl</i>                                                 |
| <code>. gen predu = fit + `t'*stdf</code>           | Calculate upper prediction band (using standard error of the forecast), <i>predu</i>                                                 |

- 4) Now the variables saved in step 3 can be used for plotting. To produce a graph similar to that in Figure 1, panel c:

```
. twoway rarea confl confu meanbase || line fit meanbase ||
```

where *rarea* calls an area plot to depict the confidence bands and *line* plots the predicted values. Note that we created more elaborate versions of these commands to enhance their appearance (e.g., inserting reference lines, tick marks, etc.). In order to produce a bubble graph similar to Figure 3, panel b:

```
. twoway rarea confl confu meanbase || line fit meanbase || scatter diffimp meanbase  
[aw=1/se_diffimp^2], msymbol(Oh) ||
```

This command sizes bubbles according to the fixed-effects variance estimate; the random-effects equivalent can be produced by summing the random-effects variance component,  $\tau^2$ , and the fixed-effects variance:

```
. gen TWr=1/(fevar + τ2)
```

where *fevar* is  $1/TW$  and  $\tau^2$  is a constant value taken from the statistical output. Now the equivalent command sizes the bubbles according to their total weight:

```
. twoway rarea confl confu meanbase || line fit meanbase || scatter diffimp meanbase  
[aw=TWr], msymbol(Oh) ||
```

Note that just like the variables in step 3, *TWr* would need to be recalculated for each such model because  $\tau^2$  and the other variables vary from model to model.

- 5) In order to show the prediction interval surrounding the meta-regression line, such as in Figure 3, panel c:

```
. twoway rarea predl predu meanbase || line fit meanbase ||
```

- 6) In order to display the empirical Bayesian estimates along with the meta-regression line and confidence bands,

```
. twoway || rarea confl confu meanbase || line fit meanbase || scatter xbu meanbase,  
msymbol(t) ||
```

Or, to overlay the observed *T*s along with their predicted true values assuming the fitted model is correct along with the confidence bands, similar to Figure 3, panel d:

```
. twoway || rarea confl confu meanbase || line fit meanbase || scatter diffimp meanbase  
[aw=TWr], msymbol(Oh) || scatter xbu meanbase, msymbol(t) ||
```

## Appendix II: Calculating and Displaying Confidence Bands in Meta-Regression Using metafor with R

We used commands similar to these in order to create the graphs in Figures 2 and 3.

- 1) First install R and the package metafor, which is available via the Comprehensive R Archive Network (CRAN) at <http://CRAN.R-project.org/package=metafor>, the author's website at <http://www.wvbauer.com/>, or through a directly command within R: `install.packages("metafor")` (one needs an internet connection and appropriate access rights on the computer). Then open metafor and load the dataset, which in this example we have named QoL, using these commands:

```
library("metafor")
data("QoL", package="metafor")
print (QoL, row.names=FALSE)
```

- 2) Now fit the meta-analytic model with the quadratic effect of targeted aerobic METs and proportion of females using the command `rma.uni()` as follows:

```
aeromet <- rma(d, vi, mods=~aerobicmet+I(aerobicmet^2)+expwomen, subset=((design == 1
|design == 0) & fup == 2), data = QoL, method="ME")
```

The model has 3 independent variables: `aerobicmet`, `aerobicmet2` (the two aerobic METs terms) and `expwomen` (percentage of the sample that is female). If fixed-effects assumptions are desired instead of mixed-effects, then replace `ME` with `FE`. The “subset=” portion of the command can be ignored; it is used in this case in order to narrow the sample to the cases that we wished to model.

- 3) To obtain the predicted values:

```
predsaeromet <- predict(aeromet, newmods=cbind(seq(1,8,.1), seq(1,8,.1)^2, 79))
wi <- 1/sqrt(QoL$vi)
size <- 0.5 + 3 * (wi - min(wi))/(max(wi) - min(wi))
```

The value 79 is the sample mean for percentage of females.

- 4) Then plot the predicted values and the confidence bands:

```
plot(QoL$aerobicmet, QoL$d, type="n", xlab = "Targeted aerobic METs",
ylab = "QoL Effect Size (d)", xlim=c(1, 8), ylim=c(-0.1, 1.5))
lines(seq(1,8,.1), predsaeromet$pred, col="navy")
lines(seq(1,8,.1), predsaeromet$ci.lb, lty = "dashed", col=" blue")
lines(seq(1,8,.1), predsaeromet$ci.ub, lty = "dashed", col=" blue")
```

- 5) In order to plot the estimates beyond the observed range of the studies (in this case up to 12):

```
predsaeromet <- predict(aeromet, newmods=cbind(seq(1,12,.1), seq(1,12,.1)^2, 79))
wi <- 1/sqrt(QoL$vi)
size <- 0.5 + 3 * (wi - min(wi))/(max(wi) - min(wi))
plot(QoL$aerobicmet, QoL$d, type="n", xlab = "Targeted aerobic METs",
ylab = "QoL Effect Size (d)", xlim=c(1, 12), ylim=c(-0.1, 6))
lines(seq(1,12,.1), predsaeromet$pred, col="red")
lines(seq(1,12,.1), predsaeromet$ci.lb, lty = "dashed", col=" blue")
lines(seq(1,12,.1), predsaeromet$ci.ub, lty = "dashed", col=" blue")
```

- 6) To plot the observe values for a particular subset of the sample, first create a subsample:

```
dwomen <- subset(QoL, expwomen==100 & (design == 1 |design == 0) & fup == 2)
dmen <- subset(QoL, expwomen==0)
```

- 7) Then plot studies with, for example, primarily men first:

```
plot(dmen$aerobicmet, dmen$d, pch = 21, col = "black", bg = "navy", cex = size,
```

## The Moving Constant Technique, Appendix: 5

```
xlab = "Targeted aerobic METs", ylab = "QoL", ylim=c(-0.6, 1.5), xlim=c(1, 6))
lines(seq(1,6,.1), predsaeromet$pred, col="dark green")
lines(seq(1,6,.1), predsaeromet$ci.lb, lty = "dashed", col=" blue")
lines(seq(1,6,.1), predsaeromet$ci.ub, lty = "dashed", col=" blue")
abline(h = 0, lty = "dotted", col="red")
```
